# Supplementary material for: Behavior of Piglets in an Observation Arena before and after Surgical Castration with Local Anesthesia
Source: MDPI journal article supplement (doi:10.3390/ani13030529), 2023-02-02
Supplement: s1 [file s1]

**Table S1.** Termination criteria during observation of piglets in observation arena; piglets that showed these behaviors were immediately removed from the observation arena and returned to their home pens.

| Termination criterion       | Definition                                                                                    |
|-----------------------------|-----------------------------------------------------------------------------------------------|
| Nervousness                 | Animal appears scared, shows trembling or jumpiness                                           |
| Pivoting                    | Animal is continuously in motion and moves around in circles                                  |
| Escape attempts             | Piglet is rising on hind legs more than once or attempts to jump out of the observation arena |
| High-frequency vocalization | Piglet makes repeated high-frequency calls                                                    |
| Freezing                    | Piglet stops all movement and doesn't react to outside stimuli                                |
